# Supplementary material for: Hydroxyl-assisted selective epoxidation of perillyl alcohol with hydrogen peroxide by vanadium-substituted phosphotungstic acid hinged on imidazolyl activated carbon
Source: Royal Society of Chemistry journal article supplement (doi:10.1039/d2nj00040g), 2022-01-01
Supplement: d2nj00040g1.pdf [file d2nj00040g1.pdf]

Electronic Supplementary Material (ESI) for New Journal of Chemistry.

## Hydroxyl-assisted selective epoxidation of perillyl alcohol with hydrogen peroxide by vanadium-substituted phosphotungstic acid hinged on imidazolyl activated carbon

Huiting He<sup>1</sup>, Min Zheng<sup>2,3</sup>, Qiang Liu<sup>1</sup>, Jian Liu<sup>1</sup>, Juan Zhao<sup>1</sup>, Yuting Zhuang<sup>1</sup>, Xianxiang Liu<sup>1</sup>, Qiong Xu<sup>1</sup>, Steven R. Kirk<sup>1</sup> and Dulin Yin<sup>1\*</sup>

1. National & Local Joint Engineering Laboratory for New Petro-chemical Materials and Fine Utilization of Resources, College of Chemistry and Chemical Engineering, Hunan Normal University Changsha, 410081 (China)

2. College of Physics and Chemistry, Hunan First Normal University, Changsha 410205, China

3. College of Material Science & Engineering, Central South University of Forestry and Technology, Changsha 410004, China

\*E-mail: [dulinyin@126.com](mailto:dulinyin@126.com), [steven.kirk@cantab.net](mailto:steven.kirk@cantab.net)

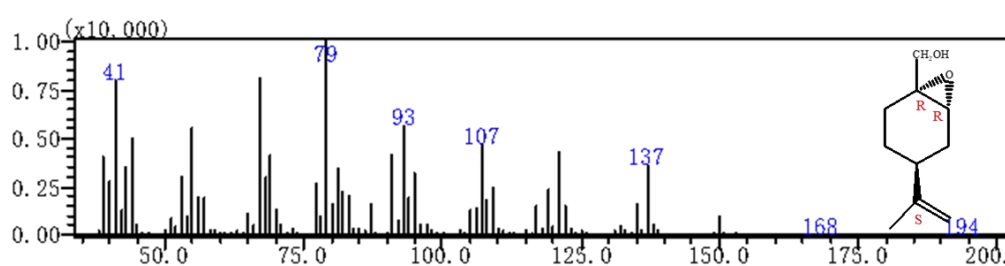

Fig. S1. GC-MS of cis-1,2-epoxide

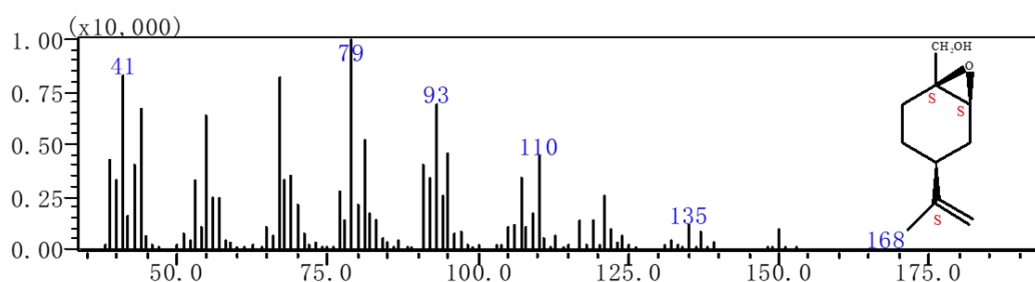

Fig. S2. GC-MS of trans-1,2-epoxide

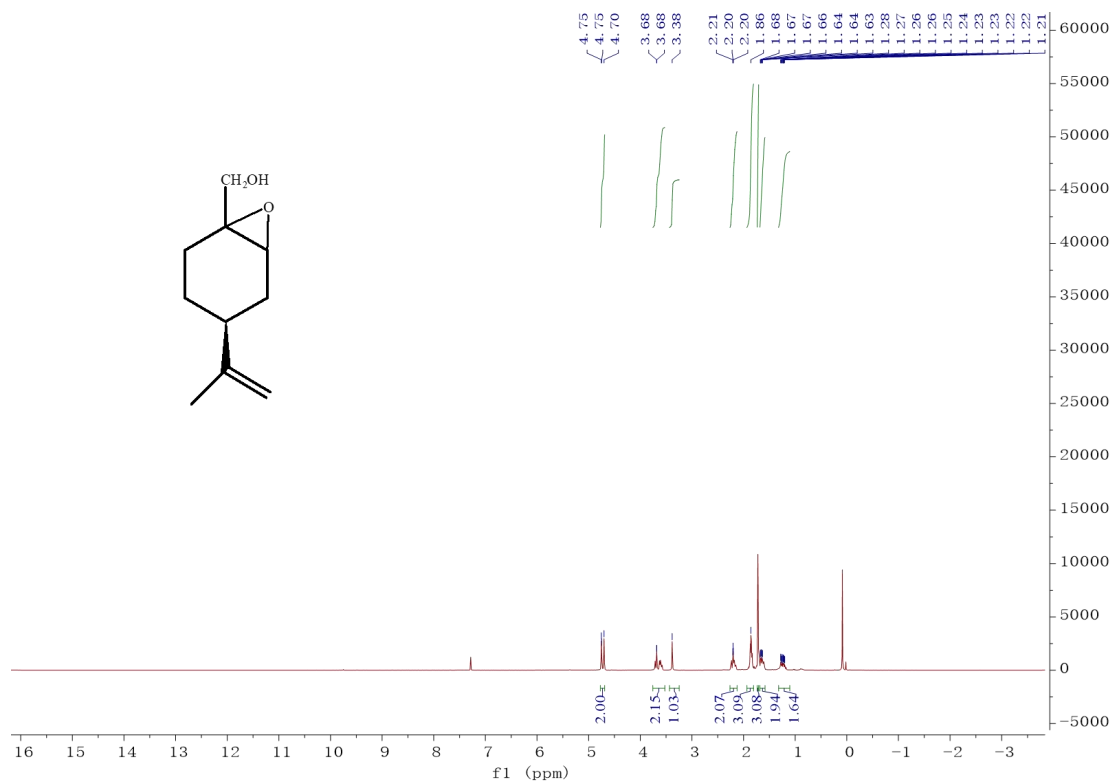

Fig. S3. <sup>1</sup>H NMR of 1,2-epoxide diastereomeric mixture

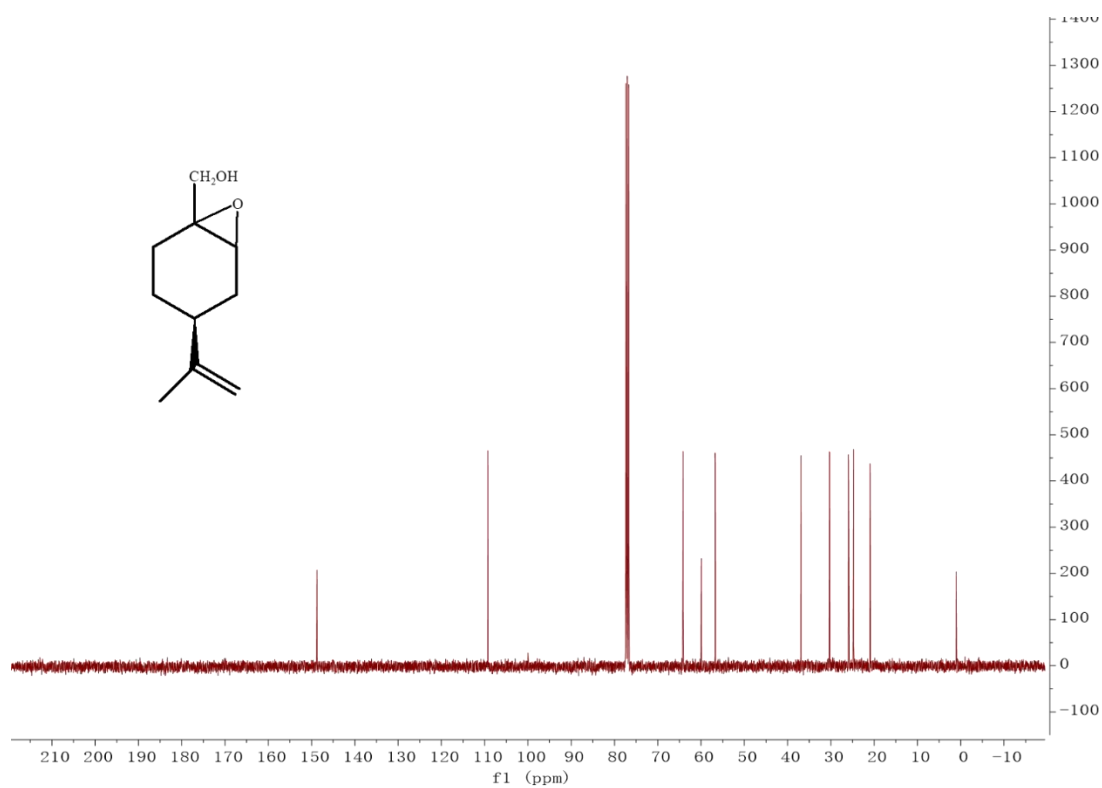

Fig. S4. <sup>13</sup>C NMR of 1,2-epoxide diastereomeric mixture

Table S1. Catalytic oxidation of methallyl alcohol by AC-COIMIH<sup>+</sup>[H<sub>4</sub>PW<sub>10</sub>V<sub>2</sub>]<sup>-</sup>

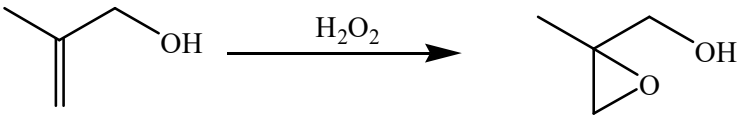

| Entry | n(H <sub>2</sub> O <sub>2</sub> ) (mmol) | Conv. (%) | Sel. (%) |                         |
|-------|------------------------------------------|-----------|----------|-------------------------|
|       |                                          |           | t=4.399  | Epoxy methallyl alcohol |
| 1     | 1.5                                      | 21.0      | 8.2      | 91.8                    |
| 2     | 3                                        | 39.0      | 14.1     | 85.9                    |

Reaction condition: 1 mmol substrate, 4 mL CH<sub>3</sub>CN, 13 wt.% of catalyst, 60 °C, 5 h.

Table S2. The oxidation reaction of limonene under different reaction conditions.

| Entry | n(H <sub>2</sub> O <sub>2</sub> ) (mol) | Time(h) | Conv. (%) | Sel. (%) |      |      |     |      |      |
|-------|-----------------------------------------|---------|-----------|----------|------|------|-----|------|------|
|       |                                         |         |           | 1        | 2    | 3    | 4   | 5    | ?    |
| 1     | 1.5                                     | 5       | 5.7       | 34.5     | 18.0 | 21.9 | -   | 15.1 | 10.5 |
| 2     | 3                                       | 12      | 37.8      | 20.4     | 39.4 | 11.9 | 3.9 | 5.2  | 19.2 |

Reaction condition: 1 mmol limonene, 4 mL CH<sub>3</sub>CN, 13 wt.% of catalyst, 60 °C.

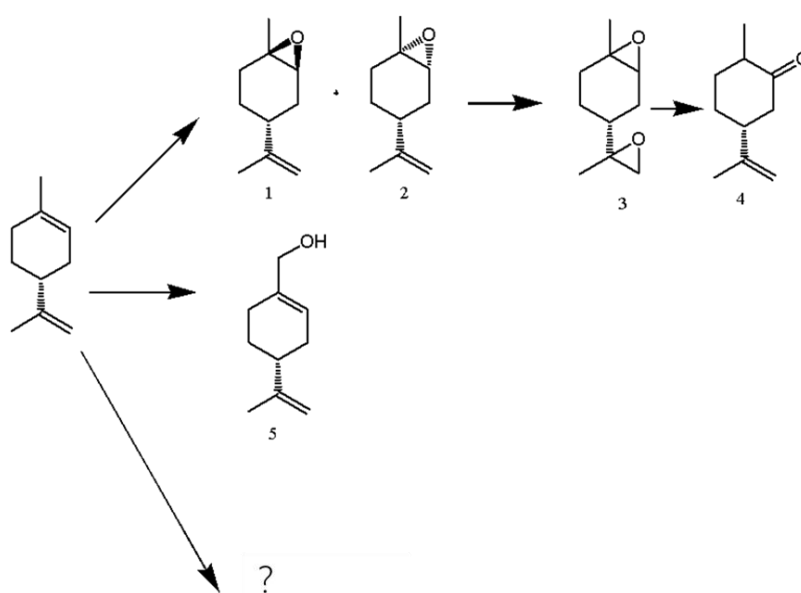

Fig. S5. Distribution of Limonene Oxidation Products

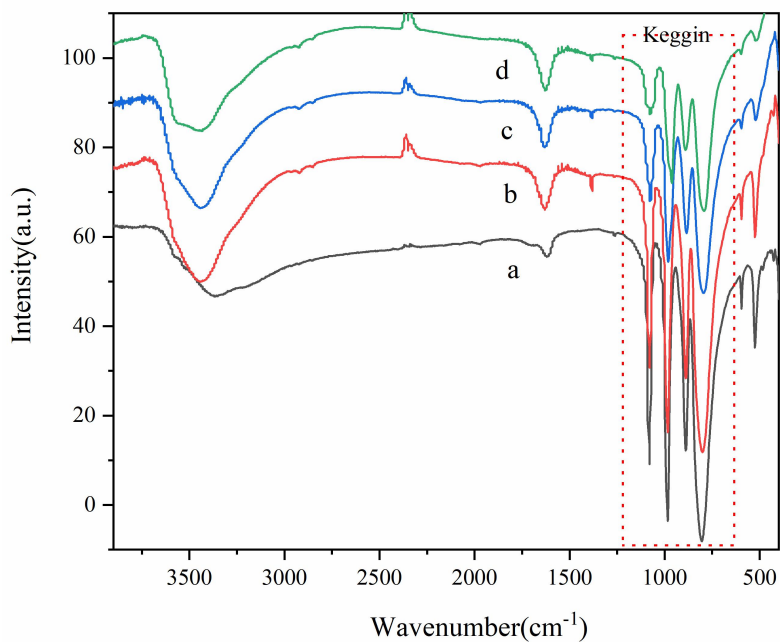

Fig. S6. FT-IR of (a)  $\text{H}_3\text{PW}_{12}\text{O}_{40}$ , (b)  $\text{H}_4\text{PW}_{11}\text{VO}_{40}$ , (c)  $\text{H}_5\text{PW}_{10}\text{V}_2\text{O}_{40}$  (d)  $\text{H}_6\text{PW}_9\text{V}_3\text{O}_{40}$

Table S3. Infrared data of vanadium substituted Keggin POMs

| Vibration method      | Wavenumber ( $\text{cm}^{-1}$ )         |                                          |                                                   |                                                |
|-----------------------|-----------------------------------------|------------------------------------------|---------------------------------------------------|------------------------------------------------|
|                       | $\text{H}_3\text{PW}_{12}\text{O}_{40}$ | $\text{H}_4\text{PW}_{11}\text{VO}_{40}$ | $\text{H}_5\text{PW}_{10}\text{V}_2\text{O}_{40}$ | $\text{H}_6\text{PW}_9\text{V}_3\text{O}_{40}$ |
| $\delta(\text{H-OH})$ | 3409                                    | 3440                                     | 3438                                              | 3448                                           |
| $\nu(\text{O-H})$     | 1626                                    | 1626                                     | 1624                                              | 1623                                           |
| $\nu(\text{P-Oa})$    | 1081                                    | 1081                                     | 1080                                              | 1079                                           |
| $\nu(\text{M=Od})$    | 984                                     | 983                                      | 983                                               | 982                                            |
| $\nu(\text{M-Ob-M})$  | 892                                     | 887                                      | 885                                               | 885                                            |
| $\nu(\text{M-Oc-M})$  | 806                                     | 804                                      | 797                                               | 794                                            |

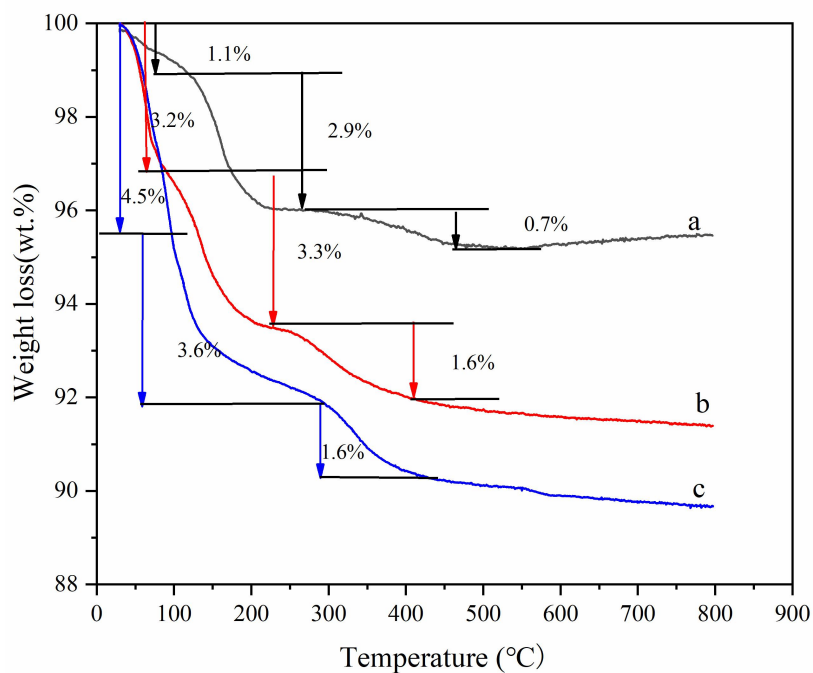

Fig. S7. TG of (a)  $\text{H}_4\text{PW}_{11}\text{VO}_{40}$ , (b)  $\text{H}_5\text{PW}_{10}\text{V}_2\text{O}_{40}$ , (c)  $\text{H}_6\text{PW}_9\text{V}_3\text{O}_{40}$

Table S4 ICP results of vanadium substituted Keggin POMs.

| Heteropolyacids                                                             | W (wt.%)          |            | V (wt.%)          |            |
|-----------------------------------------------------------------------------|-------------------|------------|-------------------|------------|
|                                                                             | Theoretical value | Test value | Theoretical value | Test value |
| $\text{H}_4\text{PW}_{11}\text{VO}_{40} \cdot 4\text{H}_2\text{O}$          | 71.70             | 71.35      | 1.81              | 1.75       |
| $\text{H}_5\text{PW}_{10}\text{V}_2\text{O}_{40} \cdot 5\text{H}_2\text{O}$ | 67.93             | 67.33      | 3.76              | 3.47       |
| $\text{H}_6\text{PW}_9\text{V}_3\text{O}_{40} \cdot 5\text{H}_2\text{O}$    | 64.27             | 64.16      | 5.94              | 5.62       |
